# Supplementary material
Source: publisher site journal article supplement (https://www.dovepress.com/get_supplementary_file.php?f=450933.docx)
Supplement: Supplementary file 1 [file get_supplementary_file.php]

**Supplementary table 1** GenBank accession numbers of ITS reference sequences

| Reference  species | GenBank accession numbers of ITS1/ITS4 sequences |
| --- | --- |
| *C.albicans* | [MN263159.1](https://www.ncbi.nlm.nih.gov/nucleotide/MN263159.1) |
| *C.tropicalis* | MT149215.1 |
| *C.glabrata* | [MK343435.1](https://www.ncbi.nlm.nih.gov/nucleotide/MK343435.1?report=genbank&log$=nucltop&blast_rank=1&RID=XKE9VJ84013) |
| *C.* *krusei* | MH545928.1 |
| *C. parapsilosis* | PP069303.1 |
| *C. lusianiae* | MK886554.1 |
| *C.kefyr* | LR738883.1 |
